# Supplementary material for: Effects of iron supplementation on growth, gut microbiota, metabolomics and cognitive development of rat pups
Source: PubMed Central journal article supplement (PMC5491036; doi:10.1371/journal.pone.0179713), 2017-06-29
Supplement: pone.0179713.s001.pdf [file pone.0179713.s001.pdf]

Ferrous sulfate supplementation studies

| Study                    | Zimmermann et al [1]                                                                                                                        | Jaeggi et al [2]                                                                                                                           | Krebs et al [3]                                                                  | Dostal et al [4]                                                                                                                   | Tompkins et al [5]                                                                                                       | Benoni et al [6]                               | Lee et al [7]                                 | Current study                                                                    |       |                            |                                    |
|--------------------------|---------------------------------------------------------------------------------------------------------------------------------------------|--------------------------------------------------------------------------------------------------------------------------------------------|----------------------------------------------------------------------------------|------------------------------------------------------------------------------------------------------------------------------------|--------------------------------------------------------------------------------------------------------------------------|------------------------------------------------|-----------------------------------------------|----------------------------------------------------------------------------------|-------|----------------------------|------------------------------------|
|                          |                                                                                                                                             |                                                                                                                                            |                                                                                  |                                                                                                                                    |                                                                                                                          |                                                |                                               | Normal rat pups                                                                  |       | Growth restricted rat pups |                                    |
| Subject/animal           | African children (n=139). 54% of children were infected with helminths, live in remote rural area with poor sanitation and low quality diet | Kenyan infants (n=115). Malaria-endemic area, 67.3% were anaemic, 25.5%, 99% breast-fed, 80% already been introduced to complementary food | Breast-fed term infants (n=55). 27% had low ferritin level, 36% had mild anemia. | South African children (n=73), from households with access to clean tap water, malaria-free environment, only mildly Fe deficient. | Male Swiss-Webster mice                                                                                                  | Sprague Dawley rats                            | Weaning piglets (n=144)                       | PD 20                                                                            | PD 56 | PD 20                      | PD 56                              |
| Iron form                | Iron-fortified biscuit, 8.8 mg Fe/d from supplementation. 12 mg Fe/d from daily meal.                                                       | Micronutrient powder containing NaFeEDTA, ferrous fumarate, daily                                                                          | Pureed meats compare to organic, whole grain iron-only fortified infant cereal.  | 50 mg Fe as ferrous sulfate for 4 d/week                                                                                           | 121 mg or 1.59 g Ferric chloride/kg compared to the control group supplemented with 2mg iron/kg from base diet with NaCl | Ferrous sulfate, 10 and 30 mg iron/kg          | 50, 100 or 250 mg iron as ferrous sulfate /kg | Daily supplementation of medium (30 µg) or High (150 µg) iron as ferrous sulfate |       |                            |                                    |
| Age                      | 6-13 y old                                                                                                                                  | 6 month old                                                                                                                                | 5 months old                                                                     | 6-11 y old                                                                                                                         | 32 d old                                                                                                                 |                                                | birth to 28 days                              | Weaning (from birth to age of 56 days)                                           |       |                            |                                    |
| Duration                 | 6 months                                                                                                                                    | 4 months                                                                                                                                   | 4-5 months                                                                       | 38 weeks                                                                                                                           | 8 weeks                                                                                                                  | 2 or 4 weeks                                   | 28 days                                       | From day 2 to day 20 after birth                                                 |       |                            |                                    |
| Gastrointestinal illness | Diarrhea, NC. Constipation, reduced, vomiting, increased.                                                                                   | Diarrhea, increased. Malaria, NC.                                                                                                          |                                                                                  | Diarrhea, stomach pain, vomiting, NC.                                                                                              |                                                                                                                          |                                                | Diarrhea, increased                           |                                                                                  |       |                            |                                    |
| Method                   | Temporal temperature gradient gel electrophoresis and qPCR                                                                                  | 16S pyrosequencing, qPCR                                                                                                                   | 16S pyrosequencing                                                               | qPCR                                                                                                                               | Culture-based                                                                                                            | Culture-based                                  | Culture-based                                 | Illumina 16S sequencing                                                          |       |                            |                                    |
| Firmicutes               |                                                                                                                                             | Increased                                                                                                                                  |                                                                                  | NC                                                                                                                                 |                                                                                                                          |                                                |                                               | NC                                                                               | NC    | NC                         | NC                                 |
| Enterococcus             |                                                                                                                                             |                                                                                                                                            |                                                                                  |                                                                                                                                    | Reduced                                                                                                                  | Reduced                                        |                                               | NC                                                                               | NC    | NC                         | NC                                 |
| Bacilli                  |                                                                                                                                             |                                                                                                                                            | Reduced                                                                          |                                                                                                                                    |                                                                                                                          |                                                |                                               | NC                                                                               | NC    | NC                         | NC                                 |
| Lactobacillus            | Reduced                                                                                                                                     |                                                                                                                                            | Reduced                                                                          | NC                                                                                                                                 | Reduced                                                                                                                  | Increased after 2 weeks                        | NC                                            | NC                                                                               | NC    | NC                         | Increased in medium Fe             |
| Clostridium              |                                                                                                                                             | Increased                                                                                                                                  | Clostridium Cluter XIVa decreased                                                | Clostridium Cluster IV and Eubacterium hallii, NC                                                                                  |                                                                                                                          | Increased                                      |                                               | NC                                                                               | NC    | Increased in High Fe (1)   | NC                                 |
| Peptostreptococcus       |                                                                                                                                             |                                                                                                                                            |                                                                                  |                                                                                                                                    |                                                                                                                          | Reduced at 4 weeks, increased after 2 weeks.   |                                               | ND                                                                               | ND    | ND                         | ND                                 |
| Bacteroidetes            |                                                                                                                                             |                                                                                                                                            | Increased                                                                        | NC                                                                                                                                 |                                                                                                                          | Reduced after 4 weeks, increased after 2 weeks |                                               | NC                                                                               | NC    | NC                         | Reduced in medium Fe               |
| Actinobacteria           |                                                                                                                                             |                                                                                                                                            | Reduced                                                                          |                                                                                                                                    |                                                                                                                          |                                                |                                               | NC                                                                               | NC    | NC                         | NC                                 |
| Bifidobacterium          | NC                                                                                                                                          | Reduced                                                                                                                                    | Reduced                                                                          | NC                                                                                                                                 |                                                                                                                          |                                                | NC                                            | NC                                                                               | NC    | NC                         | NC                                 |
| Rothia                   |                                                                                                                                             |                                                                                                                                            | Reduced                                                                          |                                                                                                                                    |                                                                                                                          |                                                |                                               | NC                                                                               | NC    | NC                         | Reduced in both median and High Fe |
| Proteobacteria           |                                                                                                                                             |                                                                                                                                            | NC                                                                               |                                                                                                                                    |                                                                                                                          |                                                |                                               | Increased in medium Fe (2)                                                       | NC    | NC                         | NC                                 |
| Enterobacteriaceae       | Increased                                                                                                                                   |                                                                                                                                            | Decrease (10.3% vs. 23.1%)                                                       | NC                                                                                                                                 |                                                                                                                          |                                                |                                               | NC                                                                               | NC    | NC                         | NC                                 |
| Shigella                 | Increased                                                                                                                                   | Increased                                                                                                                                  | NC                                                                               |                                                                                                                                    |                                                                                                                          |                                                | Coliform bacteria, NC                         | Increased in medium Fe (3)                                                       | NC    | NC                         | NC                                 |
| E.coli                   |                                                                                                                                             |                                                                                                                                            | NC                                                                               |                                                                                                                                    |                                                                                                                          | Increased                                      |                                               | NC                                                                               | NC    | NC                         | NC                                 |

\* One-way ANOVA followed by HSD turkey post-hoc test. NC = No change. ND = Not detected.

(1) In normal diet, Clostridium from family Clostridiaceae is significantly increased in high Fe group compared to the control. This does not include Clostridium from Lachnospiraceae and Erysipelotrichaceae family.

(2) p=0.07 using pairwise post-hoc Tukey test.

(3) p=0.06 using pairwise post-hoc Tukey test.

[1] Zimmermann MB, Chassard C, Rohner F, N'Goran E K, Nindjin C, Dostal A, et al. The effects of iron fortification on the gut microbiota in African children: a randomized controlled trial in Cote d'Ivoire. The American journal of clinical nutrition. 2010;92:1406-15.

[2] Jaeggi T, Kortman GA, Moretti D, Chassard C, Holding P, Dostal A, et al. Iron fortification adversely affects the gut microbiome, increases pathogen abundance and induces intestinal inflammation in Kenyan infants. Gut. 2015;64:731-42.

[3] Krebs NF, Sherlock LG, Westcott J, Culbertson D, Hambidge KM, Feazel LM, et al. Effects of different complementary feeding regimens on iron status and enteric microbiota in breastfed infants. J Pediatr. 2013;163:416-23.

[4] Dostal A, Baumgartner J, Riesen N, Chassard C, Smuts CM, Zimmermann MB, et al. Effects of iron supplementation on dominant bacterial groups in the gut, faecal SCFA and gut inflammation: a randomised, placebo-controlled intervention trial in South .... Br J Nutr. 2014;112:547-56.

[5] Tompkins GR, O'Dell NL, Bryson IT, Pennington CB. The effects of dietary ferric iron and iron deprivation on the bacterial composition of the mouse intestine. Curr Microbiol. 2001;43:38-42.

[6] Benoni G, Cuzzolin L, Zambri D, Donini M, Del Soldato P, Caramazza I. Gastrointestinal effects of single and repeated doses of ferrous sulphate in rats. Pharmacol Res. 1993;27:73-80.

[7] Lee SH, Shinde P, Choi J, Park M, Ohh S, Kwon IK, et al. Effects of dietary iron levels on growth performance, hematological status, liver mineral concentration, fecal microflora, and diarrhea incidence in weaning pigs. Biol Trace Elem Res. 2008;126 Suppl 1:557-68.
